# Supplementary material
Source: publisher figshare collection journal article supplement (https://karger.figshare.com/ndownloader/files/40914143)
Supplement: Supplementary file 1 [file 40914143]

**SEARCH STRATEGY for EMBASE**

Search Strategy:

| **#** | **Searches** | **Results** |
| --- | --- | --- |
| 1 | Intraocular hypertension/ or Open angle glaucoma.mp. [mp=title, abstract, original title, name of substance word, subject heading word, floating sub-heading word, keyword heading word, organism supplementary concept word, protocol supplementary concept word, rare disease supplementary concept word, unique identifier, synonyms] | 13419 |
| 2 | (Ocular hypertens* or Intraocular hypertens* or Intra-ocular hypertens* or Suspect glaucoma* or Open-Angle Glaucoma* or Open Angle Glaucoma*).mp. [mp=title, abstract, original title, name of substance word, subject heading word, floating sub-heading word, keyword heading word, organism supplementary concept word, protocol supplementary concept word, rare disease supplementary concept word, unique identifier, synonyms] | 20986 |
| 3 | exp Glaucoma, Open-Angle/ | 15940 |
| 4 | 1 or 2 or 3 | 26496 |
| 5 | exp Phacoemulsification/ or Phacoemulsificat*.mp. [mp=title, abstract, original title, name of substance word, subject heading word, floating sub-heading word, keyword heading word, organism supplementary concept word, protocol supplementary concept word, rare disease supplementary concept word, unique identifier, synonyms] | 14952 |
| 6 | Cataract extract*.mp. or exp Cataract Extraction/ | 38165 |
| 7 | Phacoemulsificat*.mp. or exp Phacoemulsification/ | 14952 |
| 8 | exp Glaucoma Drainage Implants/ or Glaukos.mp. or istent.mp. | 2512 |
| 9 | 5 or 6 or 7 or 8 | 42354 |
| 10 | 4 and 9 | 2459 |
| 11 | limit 10 to (yr=”2008-2022” and humans and "all adult (19 plus years)") | 896 |

**Supplementary Table 1:** Search Strategy for EMBASE: Database: Embase Classic+Embase <2008 to June 2022>
